# Supplementary material for: Peptide-Functionalized Nanoparticles for the Targeted Delivery of Cytotoxins to MMP-14-Expressing Cancer Cells
Source: MDPI journal article supplement (doi:10.3390/biophysica2030021), 2022-08-24
Supplement: s1 [file s1]

Archive with 1 entries (1 files):
- biophysica-1878826-supplementary.pdf
